# Supplementary material
Source: PubMed Central journal article supplement (PMC2748404)
Supplement: NIHMS90026-supplement-2.pdf [file NIHMS90026-supplement-2.pdf]

**Web-based Supplementary Materials for  
GENE-TRAIT SIMILARITY REGRESSION FOR  
MULTIMARKER-BASED ASSOCIATION ANALYSIS**

by

Tzeng JY, Zhang D, Chang SM, Thomas DC, Davidian M

**Web Appendix A. Derivation of the distribution of  $U_b$**

Equation (4) of the paper expresses the score statistic as  $U_b = \frac{1}{2} (Y - \hat{\mu}^0)^T V^{-1} \Omega^{-1} S_0 \Omega^{-1} V^{-1} (Y - \hat{\mu}^0)$ . To derive its distribution, we first apply Taylor expansion on  $\hat{\mu}^0$  and get that under the null hypothesis,

$$\hat{\mu}^0 = \delta(X\hat{\gamma}) \approx \mu^0 + DX(\hat{\gamma} - \gamma),$$

where  $D = \text{diag} \{ \partial \delta(\eta_i) / \partial \eta_i \}$  and  $\eta_i = X_i^T \gamma$ . By the score function  $U_\gamma = X^T D V^{-1} (Y - \mu^0)$  and that  $E(\partial U_\gamma / \partial \gamma) = -X^T D V^{-1} D X$  under  $H_0$ ,

$$(\hat{\gamma} - \gamma) \approx (X^T D V^{-1} D X)^{-1} X^T D V^{-1} (Y - \mu^0).$$

Therefore

$$\begin{aligned} Y - \hat{\mu}^0 &\approx Y - \left\{ \mu^0 + DX (X^T D V^{-1} D X)^{-1} X^T D V^{-1} (Y - \mu^0) \right\} \\ &= \left\{ I - DX (X^T D V^{-1} D X)^{-1} X^T D V^{-1} \right\} (Y - \mu^0). \end{aligned}$$

Multiplying both sides by matrix  $V^{-1}$ , we have  $V^{-1} (Y - \hat{\mu}^0) \approx Q (Y - \mu^0)$  with  $Q = V^{-1} - V^{-1} D X (X^T D V^{-1} D X)^{-1} X^T D V^{-1}$ , the projection matrix under  $H_0$ . Therefore,

$$\begin{aligned} U_b &\approx \frac{1}{2} (Y - \mu^0)^T Q \Omega^{-1} S_0 \Omega^{-1} Q (Y - \mu^0) \\ &= \frac{1}{2} \tilde{Y}^T C \tilde{Y}, \end{aligned}$$

where  $\tilde{Y} = V^{-\frac{1}{2}}(Y - \mu^0)$  and is the standardized  $Y$  under  $H_0$ , i.e., its  $i$ th element is equal to  $(Y_i - \mu_i^0) / \sqrt{v_i^0}$ . Matrix  $C = V^{\frac{1}{2}}Q\Omega^{-1}S_0\Omega^{-1}QV^{\frac{1}{2}}/2$ .

Let  $\Lambda = \text{diag}(\lambda_i)$  with  $\lambda_1 \geq \dots \geq \lambda_n$  the ordered eigenvalues of matrix  $C$ , and let  $E$  be an  $n \times n$  matrix consisting of vector  $e_i$ , the corresponding orthonormal eigenvectors of  $\lambda_i$ . We then have

$$U_b \approx \tilde{Y}^T C \tilde{Y} = \tilde{Y}^T E \Lambda E^T \tilde{Y} = Z^T \Lambda Z,$$

where  $Z = \text{diag}\{Z_i\}$  with  $Z_i \equiv e_i^T \tilde{Y}$ . Provided that each  $e_i$  is not dominated by a few elements,  $Z_i$  will be approximately independently standard normal random variables. Therefore under  $H_0$ , the distribution of  $U_b$  is approximately the same as that of  $\sum_{i=1}^n \lambda_i \chi_{1,i}^2$ , the weighted chi-squared distribution.

## Web Appendix B. Variance of $Y$ in Section 3

$$\text{cov}(Y_i, Y_j | X, H) = \mathbf{E}_\beta \{ \text{cov}(Y_i, Y_j | \beta, X, H) | X, H \} + \text{cov}_\beta \{ \mu_i(\beta), \mu_j(\beta) | X, H \}.$$

The first is zero by conditional independence. Here we tentatively rewrite  $\mu_i$  as  $\mu_i(\beta)$  to denote that  $\mu_i$  is a function of  $\beta$ . By the Taylor expansion of  $\mu_i(\beta)$  around  $\mathbf{E}\beta = 0$ ,

$$\begin{aligned} \text{cov}_\beta(\mu_i, \mu_j | X, H) &\approx \text{cov}_\beta \left\{ \mu_i(0) + \mu_i'(0)^T \beta, \mu_j(0) + \mu_j'(0)^T \beta | X, H \right\} \\ &= \mu_i'(0)^T \text{var}(\beta) \mu_j'(0) \\ &= \{g'(\mu_i^0) g'(\mu_j^0)\}^{-1} \times \tau H_i^T R_\beta H_j, \end{aligned}$$

as  $\mu_i'(\beta) = \partial \mu_i(\beta) / \partial \beta = \{g'(\mu_i)\}^{-1} H_i$ .
